# Supplementary material
Source: Springer Nature journal article supplement (https://www.springermedizin.de/resource/supplementary/12891_2011_1115_MOESM1_ESM.pdf/9507766)
Supplement: MOESM1 [file 9507766]

*Flowchart PEMF-scaphoid fractures*

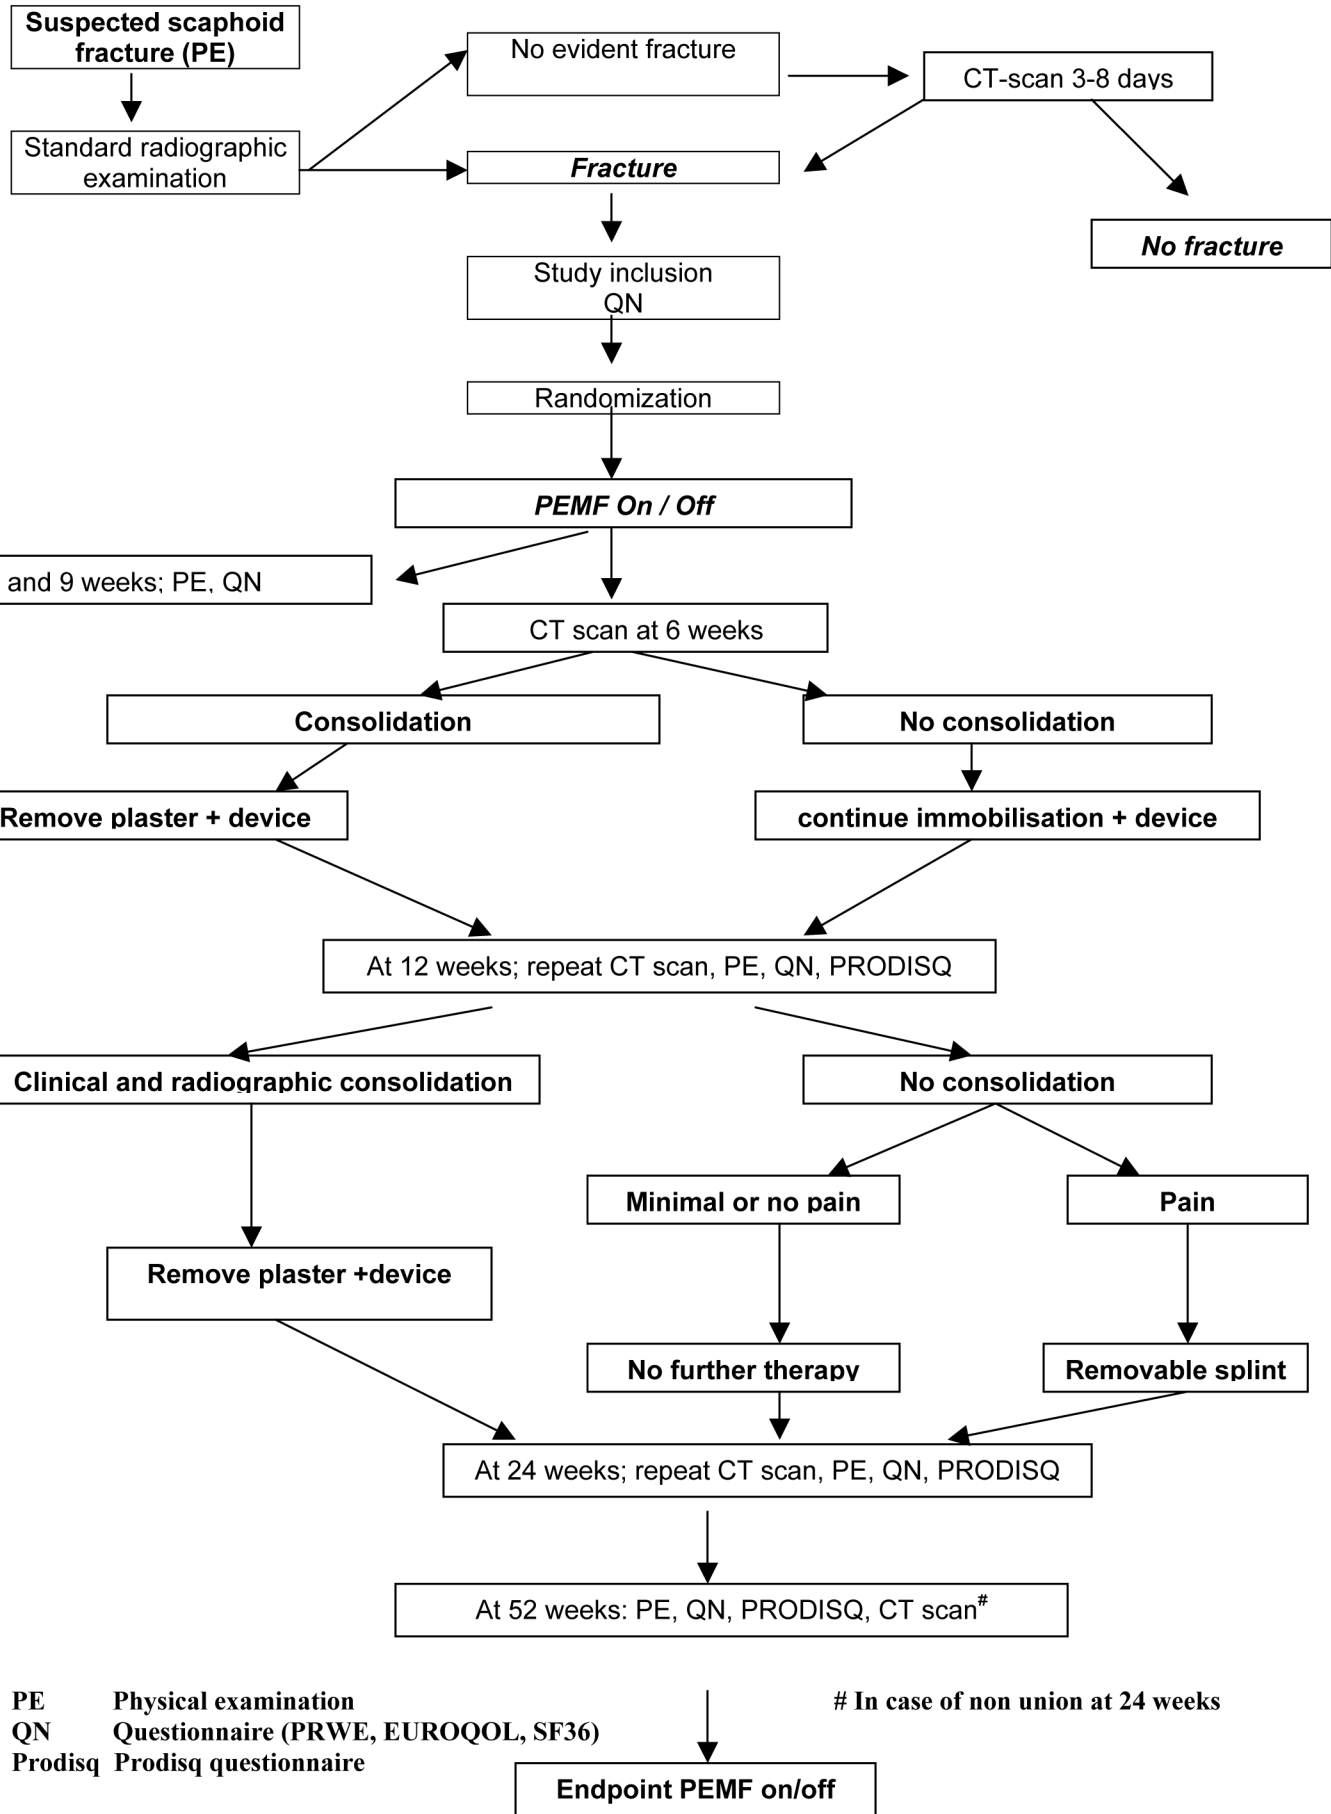

PE Physical examination  
 QN Questionnaire (PRWE, EUROQOL, SF36)  
 Prodisq Prodisq questionnaire

# In case of non union at 24 weeks

Endpoint PEMF on/off
